# Supplementary material
Source: publisher site journal article supplement (https://www.dovepress.com/article/327211)
Supplement: Supplementary file 1 [file get_supplementary_file.php]

Supplementary Table 1 The sequences of vectors in this study.

| Primer | Sequences |
| --- | --- |
| sh-BBOX1-AS1-1 | 5′-CCGCGAAGTTTCTTTCAAACTCTGCCTCGAGGCAGAGTTTGAAAGAAACTTCTTTTTG-3′ |
| sh-BBOX1-AS1-2 | 5'-CCGCTCTAAAAGCAGGCAGAGTTTGCTCGAGCAAACTCTGCCTGCTTTTAGATTTTTG-3' |
| sh-KPNA2 | 5′-CCGCGAAGTTTGCAAAGATAGCAAATTGTATACAATTTGCTATCTTTGCAAACTTCTTTTTG-3′ |
| miR-3940-3p mimic | 5'-CAGCCCGGAUCCCAGCCCACUU-3' |
| miR-3940-3p inhibitor | 5'-AAGUGGGCUGGGAUCCGGGCUG-3' |
| sh-NC | 5'-CCGCGAAGTTTGAAAGAAACTCTGCCTCGAGGCAGAGTTTCTTTCAAACTTCTTTTTG-3' |
| mimic-NC | 5'-CUCGGGCCAUCCCAGCCCACUU-3' |
| inhibitor-NC | 5'-AAGUGGGCUGGGAUGGCCCGAG-3' |
